# Supplementary material for: Sleep Duration and Disruption and Prostate Cancer Risk: a 23-Year Prospective Study
Source: Oxford University Press journal article supplement (doi:10.1158/1055-9965.epi-14-1274), 2015-12-16
Supplement: 10559965epi141274-sup-140924_3_supp_3133949_ng65c9.docx [file 10559965epi141274-sup-140924_3_supp_3133949_ng65c9.docx]

**Supplementary Table 1: Association between sleep disruption dichotomized and prostate cancer in the Health Professionals Follow-up Study, 2004-2010**

|  | Waking up during the night | | Difficulty falling asleep | | Waking up too early | | Feeling rested upon wakening | |
| --- | --- | --- | --- | --- | --- | --- | --- | --- |
|  | **Never** | **Sometimes/Always** | **Never** | **Sometimes/Always** | **Never** | **Sometimes/Always** | **Always** | **Sometimes/Never** |
| All Prostate Cancer |  |  |  |  |  |  |  |  |
| Age-Adjusted RR  (95% CI) | Ref. | 1.00  (0.87-1.16) | Ref. | 0.91  (0.78-1.06) | Ref. | 1.02  (0.89-1.16) | Ref. | 0.91  (0.78-1.05) |
| Multivariable-Adjusted RR  (95% CI) | Ref. | 1.01  (0.87-1.17) | Ref. | 0.93  (0.80-1.08) | Ref. | 1.03  (0.90-1.17) | Ref. | 0.93  (0.80-1.08) |
| Lethal Prostate Cancer |  |  |  |  |  |  |  |  |
| Age-Adjusted RR  (95% CI) | Ref. | 1.26  (0.65-2.44) | Ref. | 1.30  (0.72-2.36) | Ref. | 0.90  (0.51-1.60) | Ref. | 1.38  (0.76-2.51) |
| Multivariable-Adjusted RR  (95% CI) | Ref. | 1.43  (0.71-2.86) | Ref. | 1.41  (0.75-2.66) | Ref. | 1.02  (0.56-1.87) | Ref. | 1.67  (0.88-3.18) |
| Advanced Prostate Cancer |  |  |  |  |  |  |  |  |
| Age-Adjusted RR  (95% CI) | Ref. | 0.87  (0.52-1.46) | Ref. | 0.93  (0.54-1.57) | Ref. | 0.79  (0.49-1.28) | Ref. | 1.13  (0.68-1.89) |
| Multivariable-Adjusted RR  (95% CI) | Ref. | 0.93  (0.54-1.57) | Ref. | 0.96  (0.55-1.68) | Ref. | 0.84  (0.51-1.39) | Ref. | 1.21  (0.71-2.08) |
| Grade 8-10 Prostate Cancer |  |  |  |  |  |  |  |  |
| Age-Adjusted RR  (95% CI) | Ref. | 1.36  (0.89-2.08) | Ref. | 0.94  (0.63-1.39) | Ref. | 1.07  (0.75-1.53) | Ref. | 0.91  (0.61-1.37) |
| Multivariable-Adjusted RR  (95% CI) | Ref. | 1.35  (0.88-2.08) | Ref. | 0.96  (0.63-1.44) | Ref. | 1.10  (0.77-1.58) | Ref. | 0.90  (0.59-1.37) |
